# Supplementary material for: Serum RNAs can predict lung cancer up to 10 years prior to diagnosis
Source: eLife. 2022 Feb 11;11:e71035. doi: 10.7554/eLife.71035 (PMC8884722; doi:10.7554/eLife.71035)
Supplement: Figure 2—figure supplement 1—source data 1. [file elife-71035-fig2-figsupp1-data1.xlsx]

## Sheet: Sheet 1
seeds
