# Supplementary material for: Serum RNAs can predict lung cancer up to 10 years prior to diagnosis
Source: eLife. 2022 Feb 11;11:e71035. doi: 10.7554/eLife.71035 (PMC8884722; doi:10.7554/eLife.71035)
Supplement: Supplementary file 2. [file elife-71035-supp2.xlsx]

## Sheet: Header
	This file contains average feature importance for standard full-time models.
Model	This refers to histologies included into the model
Feature	ID of the RNA feature.
Importance	Average feature importance, higher is more important

## Sheet: All RNA standard full time
model	Feature	Importance
SCLC	tRF-18-BS68BFD2	0.0305086
SCLC	RN7SL724P	0.0247029
All histologies	iso-23-8YUYFYKSY	0.0192785
All histologies	piR-hsa-28723	0.0158236
SCLC	tRF-22-947673FE5	0.0146374
SCLC	PTCH2	0.0144776
All histologies	INTS10	0.0136198
SCLC	PTMA	0.0120743
SCLC	RN7SL181P	0.0117532
SCLC	hsa-miR-574-5p	0.0117205
SCLC	AC113404.1	0.0114692
SCLC	HIST1H4E	0.0113406
SCLC	tRF-31-ZRS3S3RX8HYVD	0.0112976
SCLC	ODC1	0.0112102
All histologies	GBP3	0.0106135
All histologies	iso-20-5KP25HFF	0.00912174
All histologies	tRF-18-V47P59D9	0.00906859
All histologies	tRF-20-J4S2I7L7	0.0082207
All histologies	tRF-30-6SXMSL73VL4Y	0.00790983
All histologies	hsa-miR-30a-5p	0.00788768
All histologies	RN7SL8P	0.00769469
All histologies	TLN1	0.00720417
SCLC	AKAP9	0.00640059
SCLC	piR-hsa-20757	0.00631964
SCLC	tRF-31-R29P4P9L5HJVE	0.00626513
All histologies	iso-23-BQ8DQWM4Z	0.00624244
All histologies	LINC01362	0.00604669
SCLC	C6orf223	0.00597761
All histologies	RN7SL43P	0.00569754
All histologies	PTMA	0.0053325
All histologies	DST	0.00524899
NSCLC	iso-23-909U247N04	0.005178
SCLC	RNY4P9	0.0050777
SCLC	RAP1B	0.00507089
NSCLC	iso-23-B0NKZ01J0D	0.00504967
All histologies	piR-hsa-28394	0.00476209
NSCLC	Y-RNA	0.00470158
NSCLC	iso-20-RNUW92OI	0.00463903
SCLC	RUFY2	0.00463557
All histologies	hsa-miR-99b-3p	0.00461731
All histologies	HBA2	0.00438326
All histologies	RNU1-8P	0.00431972
All histologies	RNY4P30	0.004168
All histologies	MAPRE2	0.00412055
NSCLC	iso-21-N2NBQRZ00	0.00398507
NSCLC	tRF-22-YP9LON4V3	0.00388565
NSCLC	LINC01362	0.00376363
All histologies	RNU2-59P	0.00368699
NSCLC	tRF-21-R8YP9LOND	0.00367089
NSCLC	tRF-29-86J8WPMN1EJ3	0.00362314
NSCLC	TPM4	0.00360087
All histologies	tRF-29-86V8WPMN1EJ3	0.00360015
All histologies	RNU2-4P	0.00359656
NSCLC	GPRIN1	0.00354999
All histologies	tRF-20-V47PU9XW	0.00353084
All histologies	iso-23-909U247N04	0.00347915
NSCLC	piR-hsa-11256	0.00342986
All histologies	PF4V1	0.00328124
All histologies	iso-24-9O0M4UN2EW	0.00327657
NSCLC	hsa-miR-30a-3p	0.00323982
All histologies	CXXC5	0.00313762
All histologies	piR-hsa-1336	0.00310066
SCLC	hsa-miR-30a-5p	0.00299774
All histologies	hsa-miR-193a-5p	0.00298134
All histologies	hsa-miR-99a-5p	0.00290916
NSCLC	iso-21-93YHZKFDB	0.00281789
NSCLC	piR-hsa-28488	0.00279336
All histologies	DTX1	0.00278374
NSCLC	iso-22-42NBQRZ04	0.00277676
NSCLC	tRF-24-KY7343RXI7	0.00270234
NSCLC	hsa-miR-4446-3p	0.00269248
NSCLC	tRF-20-I89NJ4S2	0.00258113
NSCLC	tRF-29-86V8WPMN1EJ3	0.00255473
NSCLC	RNY4P30	0.00249538
NSCLC	NFIX	0.00223374
NSCLC	VTRNA1-1	0.00220516
NSCLC	tRF-29-34HWH3RXSIHM	0.00196125
NSCLC	ZEB2	0.00186203

## Sheet: Lasso standard full time
model	Feature	Importance
NSCLC	iso-20-5KP25HFF	0.0317967
NSCLC	Y-RNA	0.0316539
NSCLC	LINC01362	0.0312833
NSCLC	RN7SL181P	0.0274426
SCLC	PTCH2	0.0268187
SCLC	HIST1H4E	0.0264491
SCLC	tRF-31-R29P4P9L5HJVE	0.026006
NSCLC	tRF-31-Q1Q89P9L8422E	0.024985
SCLC	ODC1	0.0244719
NSCLC	RN7SL674P	0.0241451
NSCLC	GBP3	0.0240801
NSCLC	tRF-22-WP9N1EWJM	0.0231339
NSCLC	KIAA2022	0.0230083
NSCLC	NOL9	0.022538
NSCLC	NHSL2	0.0223169
NSCLC	RNU2-19P	0.0222225
NSCLC	RNY4P27	0.0220391
NSCLC	iso-22-B0NKZ012I	0.0212266
NSCLC	hsa-miR-30a-5p	0.020832
NSCLC	tRF-29-86V8WPMN1EJ3	0.0206029
SCLC	RN7SL181P	0.0203595
SCLC	tRF-22-947673FE5	0.0203347
NSCLC	RC3H2	0.0202767
NSCLC	iso-22-MKJIJLJ2Q	0.0201967
NSCLC	tRF-26-9MV47P596VE	0.0200902
NSCLC	TTLL12	0.0193638
NSCLC	GNAS	0.0193554
NSCLC	RP1-273N12.4	0.0191611
SCLC	hsa-miR-30a-5p	0.0191432
NSCLC	GPRIN1	0.0189567
NSCLC	tRF-23-P4R8YP9LD6	0.0189299
NSCLC	RNY4P9	0.01842
NSCLC	iso-24-XK6PFJ5DKQ	0.0174652
NSCLC	RN7SL49P	0.0173499
NSCLC	RFX1	0.0171408
All histologies	GBP3	0.0167415
NSCLC	RNY1P5	0.0165681
NSCLC	PLCG2	0.0165672
SCLC	AC113404.1	0.0162575
NSCLC	tRF-32-LQ947673FEWSJ	0.0162129
NSCLC	CXXC5	0.0161128
SCLC	hsa-miR-574-5p	0.0160865
NSCLC	SH3BP2	0.0159274
NSCLC	MANF	0.0157928
NSCLC	piR-hsa-28396	0.0157485
NSCLC	iso-19-9DZ2SP0Y	0.0156998
All histologies	iso-20-5KP25HFF	0.0155756
NSCLC	tRF-27-Q1Q89P9L842	0.0155531
SCLC	MIGA1	0.0154355
SCLC	C6orf223	0.0154221
NSCLC	RYR2	0.015388
All histologies	piR-hsa-28723	0.0153223
SCLC	CXCL8	0.0152475
NSCLC	tRF-26-R29P4P9L5HD	0.0151399
SCLC	RUFY2	0.0151108
SCLC	iso-24-875D3ZB72N	0.0151028
NSCLC	tRF-36-6SXMSL73VL4YMYE	0.0150343
SCLC	tRF-29-86V8WPMN1EJ3	0.0148924
All histologies	RN7SL181P	0.0148877
NSCLC	tRF-20-S3M8309N	0.0146466
SCLC	ASAH1	0.0144077
NSCLC	tRF-31-86V8WPMN1E8Y0	0.0141624
NSCLC	piR-hsa-28488	0.0141225
NSCLC	AC113404.1	0.013987
SCLC	PTMA	0.0139643
SCLC	tRF-25-Z3R918VBY9	0.0137717
NSCLC	tRF-36-L85DMKYUYRLHR0D	0.013595
SCLC	ACAA1	0.0135632
NSCLC	tRF-22-WD8YQ84V2	0.013415
SCLC	iso-23-X3749W540L	0.0133017
SCLC	iso-23-90FB6PY7D6	0.0130819
SCLC	iso-21-D0NKZ01J0	0.0128204
All histologies	INTS10	0.0126998
NSCLC	tRF-31-1HPSR9O9337KB	0.0126796
NSCLC	iso-22-1KXXWW5YH	0.0126208
All histologies	RNU2-27P	0.0125885
NSCLC	MICALL1	0.0125758
NSCLC	CALR	0.0125337
SCLC	tRF-32-ZRS3S3RX8HYV3	0.01233
NSCLC	KRT8	0.0120979
NSCLC	tRF-27-6978WPRLXN3	0.0120752
SCLC	tRF-28-7EMQ18Y3E7D8	0.0120527
SCLC	RNY4P9	0.0116633
SCLC	tRF-27-7343RX6NMH3	0.0116312
All histologies	tRF-29-86V8WPMN1EJ3	0.0115022
SCLC	Vault	0.0114883
SCLC	RNU2-29P	0.0113122
NSCLC	HIST1H4H	0.0112794
All histologies	CTD-3252C9.4	0.0112428
SCLC	iso-18-DHRIRHDN	0.0112229
SCLC	RN7SL277P	0.0110333
All histologies	LINC01362	0.0109969
SCLC	iso-19-5K68QRI8	0.0108232
NSCLC	tRF-27-P4R8YP9LON3	0.01079
All histologies	HIST2H2AC	0.0107053
SCLC	RBM39	0.0106931
All histologies	tRF-30-6SXMSL73VL4Y	0.0104723
All histologies	RNU1-8P	0.0104608
SCLC	tRF-17-R29P4PP	0.0104436
All histologies	tRF-22-WP9N1EWJM	0.010421
All histologies	LATS1	0.0104184
SCLC	RAP1B	0.0103369
All histologies	piR-hsa-28397	0.0103254
SCLC	RYR1	0.0102825
SCLC	RNY4P23	0.0101864
SCLC	tRF-36-L85DMKYUYRLHR0D	0.0100772
All histologies	piR-hsa-28391	0.0100476
All histologies	AC113404.1	0.0100232
SCLC	piR-hsa-26508	0.009948
All histologies	tRF-34-QKF1R3WE8RO8IS	0.0098073
SCLC	iso-23-B0NKZ01JDW	0.00980099
SCLC	iso-17-DHRIRH2	0.00977651
SCLC	FLNA	0.00970923
All histologies	RNY4P28	0.00969248
SCLC	tRF-33-PSQP4PW3FJI0V	0.00963744
SCLC	iso-23-ZKOD6SN00L	0.00963019
NSCLC	tRF-25-RKIP4OI3FJ	0.00957116
SCLC	piR-hsa-20757	0.00935946
SCLC	tRF-31-K84J83ML5FX2D	0.00934791
All histologies	hsa-miR-30a-5p	0.00923823
SCLC	tRF-39-7Z8L8NRS9NS3341S	0.00919726
SCLC	RN7SL546P	0.00918394
All histologies	PTMA	0.00913596
SCLC	YWHAZ	0.00905626
SCLC	hsa-miR-30a-3p	0.00900352
SCLC	tRF-25-R8YP9LON4V	0.00899529
SCLC	iso-21-XJP9OUJ0D	0.00894043
SCLC	iso-20-X86XRIBP	0.0089377
All histologies	TTLL12	0.00878267
SCLC	iso-24-B0NKZ01JI0	0.00876236
SCLC	CTB-16J4.1	0.00875517
All histologies	ATP8A1	0.00872292
All histologies	iso-22-42NBQRZ04	0.00859326
SCLC	KCNMA1	0.00854312
All histologies	hsa-miR-629-5p	0.00844863
All histologies	SLC8A3	0.00842059
SCLC	RN7SL236P	0.00834909
All histologies	RNY1P5	0.00833198
All histologies	piR-hsa-28400	0.00826669
All histologies	tRF-28-XMSL73VL4YDN	0.0082175
SCLC	tRF-29-7EMQ18Y3E7IN	0.00820279
All histologies	RNY1	0.0081404
SCLC	DYRK4	0.008072
SCLC	RNY4P24	0.00807161
SCLC	piR-hsa-7001	0.00804405
All histologies	iso-22-B0NKZ09JL	0.0079943
SCLC	PF4	0.00795429
SCLC	RNY1P5	0.00794619
SCLC	SLCO2A1	0.00792477
All histologies	RNY4P9	0.00790463
All histologies	PHF12	0.00790345
SCLC	iso-22-83P402EYN	0.0079024
All histologies	SAT1	0.00789858
SCLC	tRF-24-Z3M8ZLSSJ8	0.0078907
All histologies	RNY4P27	0.0078497
SCLC	tRF-19-RKIP4OF4	0.00777584
All histologies	tRF-22-WD8YQ84V2	0.00775413
SCLC	tRF-19-RK9P4PJZ	0.00772775
All histologies	tRF-28-R8WP9N1EWJDW	0.00772133
All histologies	AC004754.3	0.00769542
All histologies	SPEG	0.0076538
All histologies	tRF-26-PS5P4PW3FJB	0.00757012
All histologies	DTX1	0.0075685
All histologies	piR-hsa-5934	0.0075547
SCLC	piR-hsa-10337	0.00750741
All histologies	FLNA	0.00749226
SCLC	AC007040.11	0.00744478
All histologies	tRF-31-R29P4P9L5HJVE	0.00742113
All histologies	iso-20-X2X02YV1	0.00737644
SCLC	MCU	0.00736388
All histologies	BRSK1	0.0073483
All histologies	RYR2	0.00733292
SCLC	hsa-miR-339-3p	0.00728849
All histologies	iso-23-ZKOD6SN00L	0.00727768
All histologies	TLN1	0.0072605
SCLC	G3BP2	0.00715071
All histologies	ATL3	0.00711093
SCLC	tRF-26-Z3R918VBY90	0.00710811
All histologies	tRF-31-6SXMSL73VL4YD	0.0070676
All histologies	iso-21-X3749W54E	0.00704051
SCLC	iso-23-B0NKW01JD6	0.00700872
All histologies	hsa-miR-100-5p	0.00700364
All histologies	RN7SL49P	0.00699646
All histologies	HBA2	0.00696237
All histologies	MANF	0.00693523
SCLC	RN7SL515P	0.00689871
All histologies	tRF-32-LQ947673FEWSJ	0.00682166
SCLC	TUBA1B	0.00681931
All histologies	NHSL2	0.00678597
SCLC	tRF-22-JY7383RPF	0.00678263
All histologies	SNORD3B-1	0.00674514
All histologies	SNORD104	0.00671186
All histologies	iso-23-ESQ4QMRS0L	0.00669002
SCLC	tRF-18-18VBY9DV	0.00667589
SCLC	RPL3	0.00660167
SCLC	tRF-33-XSXMSL73VL4YDN	0.00659867
All histologies	H3F3B	0.00656755
All histologies	iso-21-ZKOD6SN0E	0.00653525
SCLC	tRF-33-79MP9P9NH57SD3	0.0064815
All histologies	IRS2	0.00644487
All histologies	tRF-26-R29P4P9L5HD	0.00643465
All histologies	tRF-21-I8W47W1R0	0.00643259
SCLC	iso-22-B1MPHSHZN	0.00642898
All histologies	NPIPA1	0.00642885
All histologies	SOD2	0.00639397
All histologies	tRF-31-86V8WPMN1E8Y0	0.00637078
SCLC	tRF-22-WP9N1EWJM	0.00635942
All histologies	hsa-miR-574-5p	0.00632858
All histologies	PRDM8	0.00631326
SCLC	RN7SL296P	0.0062919
All histologies	2021-03-08	0.00628416
All histologies	tRF-27-7343RX6NMH3	0.00627669
SCLC	iso-22-X2EUIRIKO	0.00624454
All histologies	MLEC	0.00622001
All histologies	hsa-miR-382-5p	0.00621874
All histologies	NUDT3	0.00616273
All histologies	iso-21-OBQ87U5KD	0.00613714
All histologies	RNU2-39P	0.00612277
SCLC	RNU6-527P	0.00611971
All histologies	piR-hsa-23317	0.00608898
All histologies	PF4	0.00608225
SCLC	iso-21-1KJ0FUOZD	0.0060337
SCLC	HSPA8	0.00602657
All histologies	BRWD1	0.00597524
All histologies	MGEA5	0.00595758
All histologies	MECP2	0.00591049
SCLC	piR-hsa-18482	0.00583984
All histologies	POTEE	0.00583833
SCLC	RN7SL4P	0.00582488
All histologies	C6orf223	0.0058092
All histologies	NDUFS7	0.00579551
SCLC	TIE1	0.00578364
All histologies	CALR	0.00577811
All histologies	USMG5	0.00573075
All histologies	TULP1	0.00572625
All histologies	DDX3X	0.00569426
All histologies	RN7SL3	0.00566119
All histologies	iso-22-1KXXWW5YH	0.0056427
All histologies	iso-22-2X5YXJ8YN	0.00561302
All histologies	KIAA2022	0.00558609
All histologies	tRF-19-R29P4PJZ	0.00555245
All histologies	DNAJB6	0.00554406
All histologies	LRP8	0.00547493
All histologies	hsa-miR-30a-3p	0.00545159
SCLC	piR-hsa-25779	0.00542812
All histologies	TCF3	0.00541894
All histologies	iso-21-UPUYXLEUD	0.00540587
All histologies	GOLGA2	0.00537146
All histologies	UBC	0.00536303
SCLC	POTEJ	0.00536137
All histologies	iso-20-FYRYFKQE	0.00531625
All histologies	RNY4P18	0.00527712
All histologies	RP1-273N12.4	0.00525354
All histologies	GTF2IRD2	0.00524833
All histologies	MTRNR2L4	0.00517567
All histologies	RASGEF1C	0.00514171
All histologies	piR-hsa-4945	0.00512983
All histologies	tRF-20-S3M8309N	0.0050789
All histologies	RNY4P37	0.00507715
All histologies	RC3H2	0.0050722
All histologies	iso-23-BJ93X2RH6	0.00506248
All histologies	iso-20-X86XRIBP	0.00500215
All histologies	tRF-18-79MP9P04	0.00499442
All histologies	BCL2L2-PABPN1	0.00499193
All histologies	iso-25-B0NKZ01JO3	0.00497626
All histologies	HIST1H4H	0.0049748
SCLC	RNU2-26P	0.00496798
All histologies	iso-22-N91S5WZFM	0.00475979
All histologies	iso-23-OBQ87U5KDN	0.00473806
All histologies	MPST	0.00467857
All histologies	tRF-28-08R959KUMK9	0.00463095
All histologies	HLA-E	0.00459875
All histologies	EPN1	0.00449792
All histologies	RNU6-2	0.00447328
All histologies	piR-hsa-7238	0.00446256
All histologies	iso-20-BQ8DQWM4	0.00444242
All histologies	iso-20-5BNBY693	0.004442
All histologies	TM2D3	0.00440074
All histologies	iso-19-RP93V6H7	0.00438751
All histologies	GLUL	0.00437339
All histologies	SBNO2	0.00436282
All histologies	DPP9	0.00426094
All histologies	ZNF318	0.00418439
All histologies	tRF-32-86J8WPMN1E8YN	0.00416177
All histologies	RRAGC	0.00414259
All histologies	EXOC3	0.00414101
SCLC	POTEE	0.00409538
All histologies	POTEJ	0.00407675
All histologies	iso-18-8YUYFYDJ	0.00407552
All histologies	HDGFL1	0.00400619
SCLC	tRF-27-I8W47W1R7HH	0.0039829
All histologies	CARM1	0.0038825
All histologies	RNF138	0.00380628
SCLC	tRF-27-Z3M8ZLSSXUL	0.00378292
All histologies	iso-21-VDX047XKB	0.00377892
All histologies	hsa-miR-193b-5p	0.00371123
All histologies	tRF-33-EH623K7SIR3DDY	0.00359843
All histologies	ANKRD11	0.00351226
All histologies	tRF-34-I8W47W1R7HFEE2	0.00349805
SCLC	CACNB2	0.00340679
All histologies	tRF-35-P4R8YP9LON4VN1	0.00335988
All histologies	KIF1A	0.00295765

## Sheet: Univariate standard full time
model	Feature	Importance
SCLC	piR-hsa-7001	0.138952
SCLC	tRF-27-7343RX6NMH3	0.138023
SCLC	RN7SL296P	0.122642
SCLC	piR-hsa-5067	0.117498
SCLC	tRF-36-L85DMKYUYRLHR0D	0.11717
SCLC	piR-hsa-28646	0.113705
SCLC	piR-hsa-20757	0.109648
SCLC	piR-hsa-26508	0.0918186
NSCLC	LINC01362	0.0479753
SCLC	piR-hsa-28131	0.0450875
NSCLC	GBP3	0.0422506
NSCLC	tRF-25-9MV47P596V	0.0417024
NSCLC	piR-hsa-7193	0.0403232
NSCLC	RNY1	0.0396646
All histologies	GBP3	0.0367123
All histologies	LINC01362	0.0359412
All histologies	hsa-miR-30a-5p	0.0350354
NSCLC	RN7SL181P	0.0320101
NSCLC	BRMS1L	0.0304945
All histologies	piR-hsa-7193	0.0290003
All histologies	RN7SL181P	0.0289573
All histologies	RNY1	0.0273688
NSCLC	RN7SL634P	0.0268718
NSCLC	tRF-35-6SXMSL73VL4YMY	0.0268536
NSCLC	RNU1-136P	0.0267316
NSCLC	tRF-19-B2NZW7HV	0.0260439
NSCLC	RN7SL143P	0.0249497
NSCLC	RN7SL397P	0.0245926
NSCLC	RN7SL502P	0.0238832
NSCLC	tRF-19-73VL4YHE	0.022906
NSCLC	tRF-36-6SXMSL73VL4YMYE	0.0224646
All histologies	RN7SL97P	0.0224568
All histologies	BRMS1L	0.0223377
All histologies	RN7SL397P	0.0217509
All histologies	RNY4P37	0.0212605
All histologies	RN7SL634P	0.0210466
NSCLC	tRF-26-9MV47P596VE	0.0209949
NSCLC	SNORD3B-1	0.0205609
NSCLC	tRF-33-PSQP4PW3FJI0V	0.0202821
NSCLC	piR-hsa-23317	0.0202034
All histologies	RN7SL143P	0.0201486
NSCLC	tRF-35-PW5SVP9N15WV7W	0.019774
All histologies	CTC-471C19.1	0.0195499
All histologies	RNU1-136P	0.0194902
All histologies	piR-hsa-28646	0.0190211
NSCLC	RN7SL97P	0.0186538
NSCLC	RN7SL33P	0.0185891
All histologies	tRF-19-B2NZW7HV	0.0185006
NSCLC	RN7SL43P	0.018305
All histologies	piR-hsa-27616	0.0178695
All histologies	piR-hsa-23655	0.017576
NSCLC	RN7SL4P	0.0171534
NSCLC	RN7SL300P	0.0171384
NSCLC	RN7SL242P	0.0170316
All histologies	RN7SL502P	0.0162669
All histologies	tRF-19-R29P4PJZ	0.0161921
All histologies	RN7SL308P	0.01608
All histologies	tRF-19-RK9P4PJZ	0.0160156
All histologies	tRF-35-PW5SVP9N15WV7W	0.0160133
All histologies	tRF-34-I8W47W1R7HFEE2	0.0159647
All histologies	tRF-33-1HPSR9O9337KR	0.0159369
All histologies	tRF-34-6SXMSL73VL4YHE	0.0158016
NSCLC	RN7SL308P	0.0158014
NSCLC	tRF-29-94SX73V2Y81W	0.0156435
All histologies	piR-hsa-1207	0.0155734
NSCLC	RN7SL87P	0.0153023
All histologies	tRF-19-73VL4YHE	0.0152589
All histologies	piR-hsa-20757	0.0149873
NSCLC	RN7SL49P	0.0147936
NSCLC	tRF-28-R8WP9N1EWJDW	0.0147493
NSCLC	RN7SL795P	0.014717
NSCLC	RN7SL674P	0.0146408
NSCLC	RN7SL597P	0.0140349
All histologies	piR-hsa-2153	0.0137723
NSCLC	tRF-27-7343RX6NMH3	0.0136292
All histologies	RN7SL408P	0.0134121
All histologies	tRF-28-R8WP9N1EWJDW	0.0133372
All histologies	piR-hsa-26508	0.0131647
NSCLC	tRF-33-87R8WP9I1EWJDW	0.0129962
All histologies	piR-hsa-23317	0.012841
NSCLC	RN7SL3	0.0127548
NSCLC	RN7SL546P	0.0125559
All histologies	RN7SL33P	0.0124347
NSCLC	RN7SL151P	0.0121991
All histologies	SNORD3B-1	0.0121569
All histologies	tRF-26-9MV47P596VE	0.0121188
NSCLC	tRF-33-87R8WP9N1EWJDW	0.0118933
NSCLC	RN7SL767P	0.0118391
NSCLC	RN7SL5P	0.0117904
All histologies	RN7SL151P	0.0117488
NSCLC	tRF-31-389MV47P596VE	0.0116529
NSCLC	RN7SL296P	0.0116039
All histologies	tRF-29-94SX73V2Y81W	0.0115235
All histologies	tRF-33-PSQP4PW3FJI0V	0.0115009
All histologies	RN7SL724P	0.0113266
NSCLC	RN7SL2	0.0110541
NSCLC	RN7SL128P	0.0110347
All histologies	tRF-33-87R8WP9I1EWJDW	0.0109026
All histologies	piR-hsa-28478	0.0108571
All histologies	RN7SL87P	0.0107377
All histologies	piR-hsa-26946	0.0102371
All histologies	RN7SL43P	0.0102311
All histologies	tRF-27-7343RX6NMH3	0.00979283
All histologies	RN7SL795P	0.00968921
All histologies	RN7SL296P	0.00945056
All histologies	RN7SL300P	0.00920326
All histologies	RN7SL5P	0.00912151
All histologies	piR-hsa-12790	0.00911407
All histologies	RN7SL242P	0.00903336
All histologies	RN7SL3	0.00881943
All histologies	RN7SL49P	0.00867425
All histologies	tRF-33-87R8WP9N1EWJDW	0.00866645
All histologies	RN7SL2	0.00862731
All histologies	RN7SL4P	0.0085078
NSCLC	SNORD3D	0.00837458
All histologies	RN7SL674P	0.00811784
All histologies	RN7SL597P	0.00799691
All histologies	RN7SL546P	0.00788473
All histologies	SNORD3D	0.00774709
NSCLC	SNORD3A	0.00745775
All histologies	piR-hsa-1336	0.00743115
All histologies	SNORD3B-2	0.00702991
NSCLC	SNORD3B-2	0.0070116
All histologies	RN7SL767P	0.00656562
All histologies	RN7SL128P	0.00558847
All histologies	piR-hsa-28131	0.00545558
All histologies	piR-hsa-26747	0.00487508
All histologies	SNORD3A	0.00464534
NSCLC	SNORD3C	0.00406527
SCLC	piR-hsa-18905	0.00364089
All histologies	SNORD3C	0.00262905
SCLC	piR-hsa-26399	0.00160705
All histologies	piR-hsa-26754	0.00136305
All histologies	piR-hsa-26399	0.0013068
All histologies	piR-hsa-1077	0.00115243
All histologies	piR-hsa-25779	0.000849712
All histologies	piR-hsa-25780	0.000175075

## Sheet: miRNA standard full time
model	Feature	Importance
SCLC	hsa-miR-574-5p	0.111951
SCLC	hsa-miR-30a-5p	0.0875046
SCLC	hsa-miR-106b-5p	0.0414974
All histologies	hsa-miR-99a-5p	0.0249739
All histologies	hsa-miR-1908-5p	0.0196612
All histologies	hsa-miR-3925-5p	0.0191638
All histologies	hsa-miR-629-5p	0.0180703
All histologies	hsa-miR-1-3p	0.0156705
NSCLC	hsa-miR-629-5p	0.0152385
All histologies	hsa-miR-326	0.0150319
NSCLC	hsa-miR-99a-5p	0.0148695
All histologies	hsa-miR-30a-5p	0.0145395
NSCLC	hsa-miR-7704	0.0137356
All histologies	hsa-miR-106b-3p	0.0132527
NSCLC	hsa-miR-1-3p	0.0128844
NSCLC	hsa-miR-181a-2-3p	0.0125381
NSCLC	hsa-miR-125a-3p	0.0121303
All histologies	hsa-miR-181a-2-3p	0.0120641
All histologies	hsa-miR-548j-5p	0.0115312
NSCLC	hsa-miR-1908-5p	0.0112825
All histologies	hsa-miR-99b-3p	0.011197
All histologies	hsa-miR-423-5p	0.0109107
All histologies	hsa-miR-574-5p	0.0108965
NSCLC	hsa-miR-574-5p	0.0108715
All histologies	hsa-miR-100-5p	0.0108675
All histologies	hsa-miR-1246	0.0106328
NSCLC	hsa-miR-106b-3p	0.01049
All histologies	hsa-miR-186-5p	0.0102998
All histologies	hsa-miR-2110	0.0101823
All histologies	hsa-miR-181a-5p	0.0101557
NSCLC	hsa-miR-99b-3p	0.0101171
All histologies	hsa-miR-22-3p	0.00980071
All histologies	hsa-miR-339-3p	0.00975344
All histologies	hsa-miR-152-3p	0.0097409
NSCLC	hsa-miR-548j-5p	0.00970127
NSCLC	hsa-miR-5585-3p	0.00965736
NSCLC	hsa-miR-181b-5p	0.00956269
All histologies	hsa-miR-370-3p	0.00948812
NSCLC	hsa-miR-6842-3p	0.00925253
All histologies	hsa-miR-339-5p	0.00898362
NSCLC	hsa-miR-1273h-5p	0.00889796
NSCLC	hsa-miR-7-5p	0.00886488
All histologies	hsa-miR-1307-3p	0.00883424
NSCLC	hsa-miR-769-5p	0.0088305
All histologies	hsa-miR-425-3p	0.00868864
All histologies	hsa-miR-23b-3p	0.00867782
NSCLC	hsa-miR-30a-3p	0.0086071
All histologies	hsa-miR-328-3p	0.0085889
NSCLC	hsa-miR-3925-5p	0.00851756
All histologies	hsa-miR-183-5p	0.00851565
NSCLC	hsa-miR-223-3p	0.00846723
All histologies	hsa-miR-1843	0.00844006
NSCLC	hsa-miR-941	0.00841493
NSCLC	hsa-miR-100-5p	0.00832735
All histologies	hsa-miR-424-3p	0.00831225
NSCLC	hsa-miR-409-3p	0.00826709
NSCLC	hsa-miR-4446-3p	0.00824034
NSCLC	hsa-miR-326	0.00821989
All histologies	hsa-miR-224-5p	0.00797633
NSCLC	hsa-miR-328-3p	0.00790038
All histologies	hsa-miR-6073	0.00787501
All histologies	hsa-miR-1307-5p	0.0078684
NSCLC	hsa-miR-1246	0.00786547
All histologies	hsa-miR-3615	0.00785984
All histologies	hsa-miR-432-5p	0.00767395
NSCLC	hsa-miR-193a-5p	0.00767267
All histologies	hsa-miR-744-5p	0.00766117
All histologies	hsa-miR-665	0.00765506
All histologies	hsa-miR-576-3p	0.00762546
NSCLC	hsa-miR-148a-3p	0.00760679
All histologies	hsa-miR-378c	0.00758432
All histologies	hsa-miR-584-5p	0.00757719
NSCLC	hsa-miR-6073	0.00752653
All histologies	hsa-miR-193b-5p	0.00748312
NSCLC	hsa-miR-186-5p	0.00746414
NSCLC	hsa-miR-2110	0.00735107
All histologies	hsa-miR-140-5p	0.00729479
All histologies	hsa-miR-320a-3p	0.00705837
All histologies	hsa-miR-101-3p	0.00699179
NSCLC	hsa-miR-744-5p	0.00694218
All histologies	hsa-miR-151a-5p	0.00691415
All histologies	hsa-miR-215-5p	0.00687532
NSCLC	hsa-miR-760	0.00683223
NSCLC	hsa-miR-589-5p	0.00680833
All histologies	hsa-miR-619-5p	0.00673912
NSCLC	hsa-miR-3196	0.00671715
NSCLC	hsa-miR-532-5p	0.00669831
All histologies	hsa-miR-27a-5p	0.00666786
NSCLC	hsa-miR-1273h-3p	0.00663658
NSCLC	hsa-miR-203a-3p	0.006633
All histologies	hsa-miR-10b-5p	0.00663117
All histologies	hsa-miR-103a-3p	0.00660012
All histologies	hsa-miR-532-5p	0.00657823
All histologies	hsa-miR-1273h-5p	0.00655352
NSCLC	hsa-miR-378c	0.00653039
All histologies	hsa-miR-4732-5p	0.0065211
NSCLC	hsa-miR-101-3p	0.00649213
NSCLC	hsa-miR-30a-5p	0.00646371
All histologies	hsa-miR-7847-3p	0.00643989
All histologies	hsa-miR-4433b-5p	0.00642991
NSCLC	hsa-miR-664a-5p	0.00636486
All histologies	hsa-miR-7704	0.00627823
NSCLC	hsa-miR-576-3p	0.00623181
All histologies	hsa-miR-139-5p	0.00622292
NSCLC	hsa-miR-4433b-5p	0.00621197
NSCLC	hsa-miR-425-3p	0.0061912
NSCLC	hsa-miR-339-3p	0.0061707
All histologies	hsa-miR-4466	0.00613702
All histologies	hsa-miR-28-5p	0.00609621
NSCLC	hsa-miR-4732-5p	0.00603822
All histologies	hsa-miR-193a-5p	0.00601777
NSCLC	hsa-miR-1268a	0.00601037
NSCLC	hsa-miR-370-3p	0.00599677
All histologies	hsa-miR-769-5p	0.00599648
All histologies	hsa-miR-148b-3p	0.0059879
All histologies	hsa-miR-671-3p	0.00598761
All histologies	hsa-miR-1268a	0.00596625
NSCLC	hsa-miR-215-5p	0.00594987
All histologies	hsa-miR-223-5p	0.00594574
All histologies	hsa-miR-409-3p	0.00592687
All histologies	hsa-miR-148a-3p	0.00592332
All histologies	hsa-miR-941	0.0059184
All histologies	hsa-miR-151a-3p	0.00589105
NSCLC	hsa-miR-4466	0.00583564
NSCLC	hsa-miR-339-5p	0.00582873
All histologies	hsa-miR-185-3p	0.00575598
All histologies	hsa-miR-7-5p	0.00575407
NSCLC	hsa-miR-342-5p	0.00575353
NSCLC	hsa-miR-185-3p	0.00574953
NSCLC	hsa-miR-184	0.005725
NSCLC	hsa-miR-3615	0.00570473
All histologies	hsa-miR-335-5p	0.00569071
All histologies	hsa-miR-139-3p	0.00567295
All histologies	hsa-miR-1180-3p	0.0056617
All histologies	hsa-miR-486-5p	0.00565173
NSCLC	hsa-miR-28-5p	0.00564973
All histologies	hsa-miR-485-5p	0.00564735
NSCLC	hsa-miR-4508	0.00557835
All histologies	hsa-miR-126-5p	0.00557259
NSCLC	hsa-miR-22-3p	0.0055376
All histologies	hsa-miR-182-5p	0.00547862
NSCLC	hsa-miR-1307-5p	0.00547143
NSCLC	hsa-miR-320a-3p	0.00545823
NSCLC	hsa-miR-1843	0.00544212
NSCLC	hsa-miR-381-3p	0.00544071
All histologies	hsa-miR-625-3p	0.0054299
All histologies	hsa-miR-5585-3p	0.0054289
NSCLC	hsa-miR-3960	0.00541431
All histologies	hsa-miR-24-2-5p	0.00540317
NSCLC	hsa-miR-625-3p	0.0053858
All histologies	hsa-miR-30a-3p	0.00538447
All histologies	hsa-miR-330-3p	0.0053774
NSCLC	hsa-miR-375-3p	0.0053698
All histologies	hsa-miR-4497	0.00530906
NSCLC	hsa-miR-24-2-5p	0.00528395
All histologies	hsa-miR-150-5p	0.00525761
NSCLC	hsa-miR-1290	0.00525396
All histologies	hsa-miR-144-3p	0.00525085
NSCLC	hsa-miR-423-3p	0.00524808
All histologies	hsa-miR-6842-3p	0.00524341
NSCLC	hsa-miR-151a-3p	0.0052102
All histologies	hsa-miR-203a-3p	0.00518291
NSCLC	hsa-miR-320c	0.00516359
NSCLC	hsa-miR-193b-5p	0.00514107
NSCLC	hsa-miR-148a-5p	0.00513735
NSCLC	hsa-miR-665	0.00512301
NSCLC	hsa-miR-486-5p	0.00511969
NSCLC	hsa-miR-224-5p	0.00511098
All histologies	hsa-miR-27b-3p	0.0051103
NSCLC	hsa-miR-548e-3p	0.00509852
All histologies	hsa-miR-184	0.00507369
All histologies	hsa-miR-155-5p	0.00507362
NSCLC	hsa-miR-584-5p	0.0050521
NSCLC	hsa-miR-423-5p	0.00503328
All histologies	hsa-miR-4508	0.00501147
All histologies	hsa-miR-484	0.00498307
NSCLC	hsa-miR-4448	0.004981
NSCLC	hsa-miR-221-3p	0.00495243
NSCLC	hsa-miR-1307-3p	0.00494595
NSCLC	hsa-miR-425-5p	0.00488499
NSCLC	hsa-let-7d-3p	0.00488309
All histologies	hsa-miR-92b-3p	0.004864
NSCLC	hsa-miR-23b-3p	0.00483281
NSCLC	hsa-miR-671-3p	0.00481193
NSCLC	hsa-miR-1301-3p	0.00479616
All histologies	hsa-miR-27a-3p	0.00479433
NSCLC	hsa-miR-4429	0.00478963
NSCLC	hsa-miR-92b-3p	0.00475483
NSCLC	hsa-miR-1285-3p	0.00473706
All histologies	hsa-let-7d-3p	0.00473202
NSCLC	hsa-miR-150-5p	0.00473094
NSCLC	hsa-let-7c-5p	0.00471179
NSCLC	hsa-miR-27a-3p	0.00466306
NSCLC	hsa-miR-1180-3p	0.00464416
NSCLC	hsa-miR-125a-5p	0.00462959
NSCLC	hsa-miR-485-5p	0.00461008
All histologies	hsa-miR-543	0.00458184
NSCLC	hsa-miR-501-3p	0.0045731
NSCLC	hsa-miR-122-5p	0.00456675
NSCLC	hsa-miR-642a-3p	0.00453714
All histologies	hsa-miR-221-3p	0.00452959
NSCLC	hsa-miR-106b-5p	0.00451089
NSCLC	hsa-miR-3158-3p	0.00450543
All histologies	hsa-miR-338-5p	0.00449381
NSCLC	hsa-miR-27a-5p	0.0044876
NSCLC	hsa-miR-4497	0.00447808
NSCLC	hsa-miR-4488	0.00447166
NSCLC	hsa-miR-126-5p	0.00446496
NSCLC	hsa-miR-4433b-3p	0.0044613
All histologies	hsa-miR-143-3p	0.00445919
NSCLC	hsa-miR-223-5p	0.0044384
NSCLC	hsa-miR-152-3p	0.00443152
All histologies	hsa-miR-181d-5p	0.00441475
NSCLC	hsa-miR-183-5p	0.00440641
All histologies	hsa-miR-3158-3p	0.00439884
NSCLC	hsa-miR-185-5p	0.00439193
All histologies	hsa-miR-125a-5p	0.00438745
NSCLC	hsa-miR-378a-3p	0.00436467
All histologies	hsa-miR-150-3p	0.004363
NSCLC	hsa-miR-144-3p	0.00435578
NSCLC	hsa-miR-432-5p	0.00435465
NSCLC	hsa-miR-151a-5p	0.00434414
All histologies	hsa-miR-1301-3p	0.00432906
All histologies	hsa-miR-181b-5p	0.0042772
All histologies	hsa-miR-425-5p	0.00426237
All histologies	hsa-miR-11400	0.00425451
NSCLC	hsa-miR-320b	0.00423406
NSCLC	hsa-miR-483-5p	0.00422625
All histologies	hsa-miR-493-3p	0.00419711
All histologies	hsa-miR-423-3p	0.00418786
All histologies	hsa-miR-1273h-3p	0.00415979
All histologies	hsa-miR-664a-5p	0.00415733
All histologies	hsa-miR-3196	0.00414763
NSCLC	hsa-miR-382-5p	0.00412851
NSCLC	hsa-miR-424-3p	0.00412455
All histologies	hsa-miR-451a	0.0041113
All histologies	hsa-miR-4448	0.00410198
All histologies	hsa-miR-4443	0.00408325
All histologies	hsa-miR-6515-5p	0.00407128
NSCLC	hsa-miR-181a-5p	0.00405383
NSCLC	hsa-miR-7847-3p	0.0040537
All histologies	hsa-miR-4488	0.00404478
NSCLC	hsa-miR-11400	0.00403995
All histologies	hsa-miR-375-3p	0.0040292
NSCLC	hsa-miR-378d	0.00401991
All histologies	hsa-let-7b-5p	0.00401427
All histologies	hsa-miR-1290	0.00399365
NSCLC	hsa-miR-320e	0.00397886
All histologies	hsa-let-7c-5p	0.00396524
NSCLC	hsa-miR-28-3p	0.00391753
All histologies	hsa-miR-342-5p	0.00390549
NSCLC	hsa-miR-99b-5p	0.00388418
All histologies	hsa-miR-125a-3p	0.00386305
NSCLC	hsa-miR-493-3p	0.00384305
All histologies	hsa-miR-140-3p	0.00384152
NSCLC	hsa-miR-125b-5p	0.00383434
All histologies	hsa-miR-134-5p	0.00383431
NSCLC	hsa-miR-484	0.00382613
NSCLC	hsa-miR-30e-5p	0.0037722
All histologies	hsa-miR-30e-5p	0.00376728
All histologies	hsa-miR-382-5p	0.00374761
NSCLC	hsa-miR-652-3p	0.00374694
NSCLC	hsa-miR-139-3p	0.00374521
All histologies	hsa-miR-192-5p	0.00374127
All histologies	hsa-let-7f-5p	0.00373519
NSCLC	hsa-miR-199a-5p	0.00371546
All histologies	hsa-miR-378d	0.00370445
All histologies	hsa-miR-30d-5p	0.00369543
NSCLC	hsa-miR-127-3p	0.00368467
NSCLC	hsa-miR-142-3p	0.00365665
NSCLC	hsa-miR-150-3p	0.00364196
All histologies	hsa-miR-223-3p	0.00363022
NSCLC	hsa-miR-134-5p	0.00361338
NSCLC	hsa-miR-181d-5p	0.00361231
NSCLC	hsa-miR-143-3p	0.00358421
All histologies	hsa-miR-486-3p	0.00358088
NSCLC	hsa-miR-486-3p	0.00356792
All histologies	hsa-miR-23a-3p	0.00354867
All histologies	hsa-miR-433-3p	0.00354528
All histologies	hsa-miR-4446-3p	0.00354394
NSCLC	hsa-miR-23a-3p	0.00353572
All histologies	hsa-miR-125b-5p	0.00351233
All histologies	hsa-miR-378a-3p	0.00350648
NSCLC	hsa-miR-1228-5p	0.00349943
NSCLC	hsa-miR-330-3p	0.00348607
All histologies	hsa-miR-760	0.0034854
NSCLC	hsa-miR-543	0.00347725
All histologies	hsa-miR-99b-5p	0.00346256
NSCLC	hsa-miR-92a-3p	0.00341225
All histologies	hsa-miR-340-5p	0.0034071
All histologies	hsa-miR-185-5p	0.00340269
NSCLC	hsa-miR-107	0.00338425
NSCLC	hsa-miR-140-5p	0.0033736
NSCLC	hsa-miR-139-5p	0.00336874
NSCLC	hsa-miR-363-3p	0.00334705
NSCLC	hsa-miR-542-3p	0.0033464
NSCLC	hsa-miR-24-3p	0.00333644
NSCLC	hsa-miR-619-5p	0.00333205
NSCLC	hsa-miR-148b-3p	0.00331825
NSCLC	hsa-miR-30e-3p	0.00330796
NSCLC	hsa-miR-222-3p	0.00325354
All histologies	hsa-miR-1228-5p	0.0032412
All histologies	hsa-miR-1285-3p	0.00321691
All histologies	hsa-miR-199a-5p	0.00318125
All histologies	hsa-let-7a-5p	0.00317799
NSCLC	hsa-miR-361-3p	0.00316835
NSCLC	hsa-miR-16-2-3p	0.00314993
All histologies	hsa-miR-106b-5p	0.00312859
All histologies	hsa-miR-122-5p	0.00309624
NSCLC	hsa-let-7i-5p	0.00306347
NSCLC	hsa-miR-19b-3p	0.00305076
NSCLC	hsa-miR-142-5p	0.00302605
All histologies	hsa-miR-107	0.00301729
All histologies	hsa-miR-320e	0.00301337
NSCLC	hsa-miR-6515-5p	0.0030031
All histologies	hsa-miR-20a-5p	0.00297138
NSCLC	hsa-miR-335-5p	0.00296087
NSCLC	hsa-miR-451a	0.00294253
NSCLC	hsa-miR-320d	0.00291579
NSCLC	hsa-let-7d-5p	0.00290472
NSCLC	hsa-miR-20a-5p	0.00287921
NSCLC	hsa-miR-4516	0.00287515
NSCLC	hsa-miR-17-5p	0.00283579
NSCLC	hsa-miR-146a-5p	0.00283056
NSCLC	hsa-miR-4443	0.00282772
All histologies	hsa-miR-30c-5p	0.00282244
All histologies	hsa-miR-19b-3p	0.0027869
NSCLC	hsa-miR-338-5p	0.00275934
NSCLC	hsa-miR-27b-3p	0.00274806
NSCLC	hsa-miR-146b-5p	0.00272992
NSCLC	hsa-miR-199a-3p	0.00268269
NSCLC	hsa-miR-126-3p	0.00267259
NSCLC	hsa-miR-26a-5p	0.00266758
NSCLC	hsa-miR-10b-5p	0.00263964
NSCLC	hsa-miR-10a-5p	0.00262511
NSCLC	hsa-miR-103a-3p	0.00258941
NSCLC	hsa-miR-182-5p	0.00258583
All histologies	hsa-miR-320b	0.00256298
All histologies	hsa-miR-25-3p	0.00252297
NSCLC	hsa-miR-25-3p	0.00247864
All histologies	hsa-miR-29a-3p	0.00237937
NSCLC	hsa-miR-192-5p	0.00229999
NSCLC	hsa-miR-93-5p	0.00228287
All histologies	hsa-miR-146b-5p	0.00222134
All histologies	hsa-miR-642a-3p	0.00221416
All histologies	hsa-miR-320c	0.00219003
All histologies	hsa-miR-10a-5p	0.00212532
All histologies	hsa-miR-361-3p	0.00210621
NSCLC	hsa-miR-340-5p	0.00209833
NSCLC	hsa-miR-128-3p	0.0020801
All histologies	hsa-miR-483-5p	0.00207243
NSCLC	hsa-miR-433-3p	0.00206796
NSCLC	hsa-miR-191-5p	0.00204077
All histologies	hsa-miR-379-5p	0.00203583
NSCLC	hsa-let-7b-5p	0.00193305
NSCLC	hsa-miR-155-5p	0.00181694
NSCLC	hsa-miR-16-5p	0.00175147
NSCLC	hsa-let-7e-5p	0.00171866
NSCLC	hsa-miR-30c-5p	0.00162731
NSCLC	hsa-miR-30d-5p	0.00156905
NSCLC	hsa-let-7a-5p	0.00152771
NSCLC	hsa-let-7f-5p	0.00147209
NSCLC	hsa-miR-29a-3p	0.00128528
NSCLC	hsa-miR-140-3p	0.00117807
NSCLC	hsa-let-7g-5p	0.0011329
NSCLC	hsa-miR-21-5p	0.00111742
NSCLC	hsa-miR-379-5p	0.000868015

## Sheet: isomiR standard full time
model	Feature	Importance
SCLC	iso-22-N2N816OK3	0.0249092
SCLC	iso-22-E8EY5MF0L	0.0246083
All histologies	iso-23-8YUYFYKSY	0.0198368
All histologies	iso-18-UIO0908	0.0181492
SCLC	iso-25-FXJ76XNKWR	0.017413
All histologies	iso-21-DIPPZBOI0	0.0137798
SCLC	iso-23-X3749W540L	0.0125217
All histologies	iso-23-BQ8DQWM4Z	0.0120075
All histologies	iso-20-5KP25HFF	0.0111753
NSCLC	iso-23-8YUYFYKSY	0.0109739
NSCLC	iso-22-B0NKZK1JN	0.01074
NSCLC	iso-21-N2NBQRZ00	0.0107199
NSCLC	iso-23-B0NKZ01J0D	0.00993616
NSCLC	iso-20-BQ8NQWM4	0.00978255
SCLC	iso-23-8YUYFYKSY	0.00958875
All histologies	iso-21-ZKOD6SN0E	0.00936096
NSCLC	iso-23-909U247N04	0.00924027
NSCLC	iso-18-RJF2Q0V	0.00916064
NSCLC	iso-23-E8EY5MF0D8	0.00902909
SCLC	iso-18-FYK3X0R	0.00900956
All histologies	iso-22-93YHZKFD5	0.00873757
NSCLC	iso-23-BRS28UWY0L	0.00860731
NSCLC	iso-20-N2N816OK	0.00856362
NSCLC	iso-21-E8EY5MF00	0.0084482
NSCLC	iso-19-RP93V6HR	0.00836469
All histologies	iso-21-Y51840YYB	0.0082803
NSCLC	iso-22-2X5YXJ8YL	0.00822817
NSCLC	iso-22-MKJIJLJ2Q	0.00802954
All histologies	iso-20-BQ8NQWM4	0.00784124
All histologies	iso-20-QVJNO2EW	0.00746931
All histologies	iso-21-N2NBQRZ00	0.00744041
NSCLC	iso-20-RNUW92OI	0.00739238
NSCLC	iso-22-B0JKZ01JL	0.00697472
All histologies	iso-23-VY2ZSR670B	0.00685003
NSCLC	iso-22-2HOMKBFPJ	0.00673956
NSCLC	iso-25-B0NKZ01JO3	0.00659606
NSCLC	iso-20-UPVPIESI	0.00657989
All histologies	iso-23-ZKOD6SN00L	0.00653397
NSCLC	iso-21-93YHZKFDD	0.00650808
All histologies	iso-20-BRS28UEY	0.00650101
NSCLC	iso-20-9DZ2SPDJ	0.00629822
NSCLC	iso-22-93YHZKFD5	0.00629578
All histologies	iso-21-X3749W54E	0.00620207
NSCLC	iso-20-93YHZKFD	0.00618218
NSCLC	iso-21-XJP9OUJ0D	0.00616422
All histologies	iso-20-X2X02YV1	0.00583561
All histologies	iso-24-B0NKZ01JHS	0.00576291
NSCLC	iso-25-B0NKZ01JO2	0.00565826
NSCLC	iso-23-E8EY5MF0DW	0.00561588
All histologies	iso-23-8YUYFYKSZ	0.00559745
SCLC	iso-22-93YHZKFD5	0.00553443
NSCLC	iso-21-9K6PFJ5DD	0.00531941
NSCLC	iso-22-1JYJXZ702	0.00527545
NSCLC	iso-23-B0NKZ01J0E	0.00520954
NSCLC	iso-21-N2N816OKB	0.00517143
NSCLC	iso-21-DE72BE9BE	0.0051569
NSCLC	iso-20-42NBQRZB	0.00505972
NSCLC	iso-22-93YHZKFDQ	0.00499539
NSCLC	iso-23-ESQ4QMRS04	0.00491421
NSCLC	iso-20-XK6PFJ5B	0.00482744
All histologies	iso-22-X237RNN03	0.00482288
All histologies	iso-23-B0NKZ01J0D	0.00480067
NSCLC	iso-21-N2N816OKE	0.00470167
NSCLC	iso-22-90EHP778H	0.00448353
NSCLC	iso-21-83PI02EZ0	0.00434893
NSCLC	iso-24-9O0M4UN2EV	0.00432029
All histologies	iso-24-B0NKZ01JHZ	0.00416622
NSCLC	iso-18-OYDI3YY	0.00407238
NSCLC	iso-21-B0NKW01J0	0.00384675
All histologies	iso-22-DIPPZBOIL	0.0038428
All histologies	iso-25-B0NKZ01JO3	0.00380433
NSCLC	iso-23-ZKOD6SN00L	0.00373263
NSCLC	iso-19-BJ93X2IZ	0.003662
All histologies	iso-22-X0SXN4X64	0.00343393
NSCLC	iso-20-DIRN506W	0.00338149
NSCLC	iso-23-E8EY5MF0DU	0.00334702
All histologies	iso-20-FYRYFKQE	0.00325729
NSCLC	iso-24-B0NKZ01J2O	0.00325368
NSCLC	iso-23-ZJ9MWV8VZ	0.00312156
All histologies	iso-20-M5MUSEDW	0.00299102
NSCLC	iso-22-83PI0KEZN	0.00286148
NSCLC	iso-22-W3PI02EZN	0.00281842
All histologies	iso-21-XK68FJ5DD	0.00267274
NSCLC	iso-23-XK6PFJ5D0P	0.00261297
All histologies	iso-23-UPUYXLEUZ	0.00254487
All histologies	iso-23-E8EY5MF0D8	0.00245888
All histologies	iso-21-J42XJBNYD	0.00232188
All histologies	iso-22-DDR0O0DKH	0.00230852
NSCLC	iso-21-B0NKZ0130	0.00225517
All histologies	iso-23-X3749W540L	0.00174569
All histologies	iso-17-F0RSRHM	0.00103777
All histologies	iso-20-ZKOD6SN0	0.00103398

## Sheet: miscRNA standard full time
model	Feature	Importance
NSCLC	Y-RNA	0.0424009
All histologies	RNY1P5	0.0401843
All histologies	RNY4P30	0.0362441
SCLC	RN7SL724P	0.0360681
All histologies	RN7SL97P	0.0338021
SCLC	RN7SL118P	0.0301182
SCLC	Vault	0.0292281
NSCLC	RNY1P13	0.0287472
All histologies	RN7SL8P	0.0282347
All histologies	RN7SL397P	0.0276225
NSCLC	RNY4P30	0.0269853
NSCLC	RNY4P9	0.0263096
All histologies	RN7SL181P	0.0253656
All histologies	RN7SL143P	0.0253065
NSCLC	RNY1P5	0.0243816
SCLC	RNY4P24	0.024173
All histologies	RN7SL151P	0.024145
All histologies	RNY3P1	0.0240133
SCLC	RN7SL559P	0.0238195
All histologies	RNY4P10	0.0233081
SCLC	KCNQ1OT1-5	0.0228963
SCLC	Y-RNA	0.0228808
All histologies	RNY4P28	0.021725
NSCLC	RN7SL634P	0.0215647
SCLC	VTRNA1-1	0.0213902
All histologies	Y-RNA	0.0211446
All histologies	RNY4P3	0.0211343
NSCLC	RNY4P27	0.0210178
All histologies	RN7SL502P	0.020849
SCLC	RNY4P20	0.0208219
NSCLC	RN7SL181P	0.0204276
SCLC	RN7SL181P	0.0201103
NSCLC	RN7SL8P	0.0199251
NSCLC	RN7SL502P	0.0198954
NSCLC	RN7SL143P	0.0190283
All histologies	RNY3P2	0.0188785
SCLC	RNY1P7	0.0187783
All histologies	RNY4P18	0.0187609
NSCLC	RN7SL397P	0.0187079
SCLC	RNY3P1	0.0186381
NSCLC	RN7SL151P	0.0184775
SCLC	RNY4P28	0.0182576
NSCLC	RNY3P2	0.0182373
SCLC	RNY4P19	0.0181305
All histologies	RN7SL634P	0.0178362
NSCLC	VTRNA1-1	0.0177337
SCLC	RNY1	0.0175304
All histologies	RNY4P27	0.0173497
NSCLC	RNY4P20	0.0172705
SCLC	RNY4P23	0.0171874
NSCLC	RN7SL97P	0.0171608
All histologies	RN7SL564P	0.0169543
NSCLC	RNY4P28	0.0167543
SCLC	RNY4P10	0.0165518
SCLC	RNY1P13	0.0161308
SCLC	RN7SL426P	0.0159644
NSCLC	RNY3P1	0.0159357
NSCLC	RNY4P13	0.0156369
NSCLC	RNY4P17	0.0156088
All histologies	RNY4P9	0.0150806
All histologies	RNY1P13	0.0148685
SCLC	RN7SL665P	0.0148569
SCLC	RN7SL634P	0.0148468
SCLC	RNY1P5	0.0147812
SCLC	RNY4P3	0.0147745
SCLC	RNY1P9	0.0145734
SCLC	RN7SL795P	0.0143025
All histologies	RNY4P17	0.0142287
NSCLC	RN7SL49P	0.0140636
SCLC	RNY3	0.0140516
NSCLC	RNY4P18	0.0140338
SCLC	RNY4P17	0.014017
SCLC	RNY4P25	0.0139854
SCLC	RNY4P18	0.0139814
All histologies	RNY1	0.0139276
SCLC	RN7SL507P	0.0137949
All histologies	RNY1P9	0.0137872
SCLC	RNY4P13	0.0137837
NSCLC	RN7SL43P	0.0137103
NSCLC	RN7SL665P	0.0136768
NSCLC	RNY4P3	0.0136712
All histologies	RNY4P6	0.013538
All histologies	RN7SL444P	0.013499
SCLC	RNY4P9	0.013205
SCLC	VTRNA1-2	0.0131278
NSCLC	RN7SL444P	0.0130104
SCLC	RN7SL43P	0.0127763
SCLC	VTRNA1-3	0.0127258
All histologies	VTRNA1-3	0.0126615
NSCLC	RN7SL724P	0.0125932
NSCLC	RNY4P19	0.0125845
SCLC	RNY4P7	0.012455
All histologies	RNY4P37	0.0121491
NSCLC	RN7SL564P	0.0121392
SCLC	RN7SL308P	0.0119661
All histologies	VTRNA1-1	0.0118392
SCLC	RN7SL4P	0.0118274
All histologies	RNY4P34	0.011805
All histologies	RN7SL838P	0.0117815
SCLC	RNY4P14	0.0117073
NSCLC	RN7SL674P	0.0116101
NSCLC	RNY1P12	0.0115901
SCLC	RNY3P2	0.0114479
SCLC	RN7SL236P	0.0114348
NSCLC	RNY1	0.0114213
SCLC	RNY4P6	0.0113837
NSCLC	RNY4P34	0.011316
NSCLC	RNY4P37	0.0113008
All histologies	RN7SL40P	0.0112976
NSCLC	RNY4P10	0.0112502
All histologies	RNY1P7	0.0110923
All histologies	RN7SL5P	0.0109989
All histologies	RNY4P16	0.0109703
SCLC	RNY4P27	0.0108609
All histologies	VTRNA1-2	0.0108483
All histologies	RNY4P19	0.0108369
SCLC	RN7SL183P	0.0108332
NSCLC	RNY4P25	0.010706
SCLC	RN7SL300P	0.0106742
SCLC	RN7SL40P	0.0105728
All histologies	RN7SL3	0.0104458
SCLC	Metazoa-SRP	0.0104148
SCLC	RN7SL397P	0.0103214
All histologies	RNY4P24	0.0102659
All histologies	RNY4P20	0.0102622
SCLC	RNY4P34	0.010248
All histologies	RN7SL674P	0.0101788
All histologies	RNY1P12	0.0101275
SCLC	RN7SL296P	0.0101147
All histologies	RN7SL183P	0.01008
SCLC	RN7SL408P	0.00988921
NSCLC	RN7SL507P	0.00982909
All histologies	RN7SL296P	0.00972189
NSCLC	KCNQ1OT1-5	0.00971701
NSCLC	RN7SL40P	0.00959639
NSCLC	7SK	0.00949522
SCLC	RN7SL33P	0.00941279
SCLC	7SK	0.00934829
NSCLC	RNY4P14	0.0093436
All histologies	RNY4P29	0.00928128
SCLC	RNY1P12	0.00926053
All histologies	RN7SL308P	0.0091936
All histologies	RN7SL118P	0.00915418
SCLC	RNY4	0.00908666
NSCLC	RNY4P6	0.00906784
NSCLC	RN7SL3	0.00900655
NSCLC	RN7SL242P	0.00896004
SCLC	RN7SL5P	0.00895397
SCLC	RNY4P29	0.00885636
NSCLC	RNY4P16	0.00882404
NSCLC	RNY1P9	0.00882286
All histologies	RN7SL617P	0.00879638
SCLC	RN7SL502P	0.00876202
NSCLC	RN7SL664P	0.00866931
NSCLC	RN7SL795P	0.00866759
NSCLC	RN7SL559P	0.00863604
All histologies	RNY4	0.00857434
NSCLC	Vault	0.00853557
NSCLC	RNY1P7	0.00852462
NSCLC	RN7SL33P	0.00842527
NSCLC	RN7SL5P	0.00829701
SCLC	RN7SL151P	0.00827147
NSCLC	RNY4P24	0.00826535
SCLC	RN7SL444P	0.00824818
NSCLC	RNY4	0.00824341
NSCLC	RNY3	0.00816883
NSCLC	RNY1P16	0.00815785
All histologies	RN7SL300P	0.00811728
SCLC	RN7SL3	0.00807684
All histologies	Metazoa-SRP	0.008052
NSCLC	RN7SL277P	0.00801054
NSCLC	RNY4P7	0.00799247
NSCLC	RN7SL118P	0.00793063
SCLC	RNY4P16	0.00792744
NSCLC	RN7SL300P	0.00785573
SCLC	RN7SL515P	0.00782283
All histologies	RN7SL664P	0.00779225
All histologies	RN7SL752P	0.00778712
NSCLC	RN7SL838P	0.00766989
All histologies	RNY4P25	0.00755474
All histologies	RN7SL795P	0.00753852
All histologies	RN7SL43P	0.00752933
NSCLC	RN7SL396P	0.00750165
SCLC	RN7SL230P	0.00749384
All histologies	Vault	0.00735936
All histologies	RNY4P7	0.00730989
NSCLC	RN7SL597P	0.00726775
SCLC	RN7SL564P	0.00725339
SCLC	RN7SL767P	0.00724298
NSCLC	VTRNA1-2	0.00717626
NSCLC	RN7SL308P	0.00710815
NSCLC	RN7SL236P	0.00706481
SCLC	RN7SL546P	0.00702143
All histologies	RN7SL546P	0.00699043
All histologies	RN7SL277P	0.00676603
SCLC	RN7SL617P	0.00670672
NSCLC	VTRNA1-3	0.00669684
SCLC	RN7SL752P	0.00664385
All histologies	RNY4P13	0.0065593
NSCLC	Metazoa-SRP	0.00653874
All histologies	RN7SL230P	0.00653088
All histologies	7SK	0.00649986
NSCLC	RNY4P29	0.0064213
All histologies	RNY3	0.0063816
NSCLC	RN7SL408P	0.00634808
NSCLC	RN7SL4P	0.00634315
SCLC	RN7SL277P	0.00629336
All histologies	RN7SL724P	0.00623295
All histologies	RNY4P14	0.00623035
NSCLC	RN7SL230P	0.0061929
All histologies	RN7SL559P	0.00617705
NSCLC	RN7SL546P	0.006063
All histologies	RN7SL515P	0.00601032
NSCLC	RN7SL296P	0.0060017
All histologies	RN7SL33P	0.00590318
All histologies	RN7SL236P	0.00589761
All histologies	RN7SL408P	0.00577107
All histologies	RN7SL507P	0.00564688
SCLC	RN7SL732P	0.00547515
SCLC	RN7SL664P	0.00547339
NSCLC	RNY4P23	0.00534492
SCLC	RN7SL396P	0.00531822
NSCLC	RN7SL183P	0.00513533
NSCLC	RN7SL508P	0.00504399
NSCLC	RN7SL426P	0.00497085
NSCLC	RN7SL767P	0.00495716
NSCLC	RN7SL515P	0.00494805
All histologies	RN7SL508P	0.00477962
All histologies	RN7SL87P	0.00477414
All histologies	RN7SL767P	0.00475416
NSCLC	RN7SL87P	0.00467334
NSCLC	RN7SL752P	0.00464619
All histologies	RN7SL732P	0.00463297
NSCLC	RN7SL617P	0.00452591
All histologies	RN7SL128P	0.00442456
NSCLC	RN7SL2	0.00437896
All histologies	KCNQ1OT1-5	0.00433735
SCLC	RN7SL508P	0.00427337
SCLC	RN7SL838P	0.0041714
All histologies	RN7SL426P	0.00413649
All histologies	RNY1P16	0.00409768
All histologies	RN7SL597P	0.00401762
All histologies	RNY4P23	0.00355685
NSCLC	RN7SL732P	0.00301765

## Sheet: tRF standard full time
model	Feature	Importance
SCLC	tRF-18-BS68BFD2	0.0799061
SCLC	tRF-31-ZRS3S3RX8HYVD	0.0647852
SCLC	tRF-22-947673FE5	0.0542948
NSCLC	tRF-18-V47P59D9	0.0189196
NSCLC	tRF-31-34HWH3RXSINHE	0.0154855
NSCLC	tRF-31-Q1Q89P9L8422E	0.0119473
NSCLC	tRF-26-9MV47P596VE	0.0107709
NSCLC	tRF-20-J4S2I7L7	0.00879181
NSCLC	tRF-28-IK9NJ4S2I7DM	0.0086353
NSCLC	tRF-25-PIR8YP9LON	0.00813727
NSCLC	tRF-23-87R8WP9NY	0.00812661
NSCLC	tRF-29-86J8WPMN1EJ3	0.00805787
All histologies	tRF-21-PNR8YP9L0	0.00799965
NSCLC	tRF-20-I89NJ4S2	0.00796126
NSCLC	tRF-18-3290Q4DZ	0.00792818
All histologies	tRF-29-86V8WPMN1EJ3	0.00790063
All histologies	tRF-23-9MV47P59D9	0.0077942
All histologies	tRF-18-73VL4YDN	0.00774022
NSCLC	tRF-20-V47P596V	0.00770931
All histologies	tRF-32-ZRS3S3RX8HYV3	0.00750147
All histologies	tRF-22-87R8WP9NH	0.00741044
NSCLC	tRF-28-XMSL73VL4YDN	0.00724895
All histologies	tRF-29-86J8WPMN1EJ3	0.00724144
NSCLC	tRF-25-9MV47P596V	0.00720891
NSCLC	tRF-36-6SXMSL73VL4YMYE	0.00710954
NSCLC	tRF-31-RK9P4P9L5HMVE	0.00704093
NSCLC	tRF-29-7EMQ18Y3E7IN	0.00690735
All histologies	tRF-32-PSQP4PW3FJIK1	0.00685586
NSCLC	tRF-25-9NJ4S2I7L7	0.00681574
NSCLC	tRF-29-F1R3WE8RO8IS	0.00679084
All histologies	tRF-25-PIR8YP9LON	0.00675119
NSCLC	tRF-22-87R8WP9NH	0.00666124
NSCLC	tRF-31-R29P4P9L5HJVE	0.00655891
All histologies	tRF-31-RK9P4P9L5HMVE	0.00633908
NSCLC	tRF-27-I89NJ4S2I7K	0.00615278
NSCLC	tRF-32-PW5SVP9N15WVN	0.00613943
NSCLC	tRF-32-ZRS3S3RX8HYV3	0.00612318
NSCLC	tRF-33-6978WPRLXN4V0Q	0.00598475
All histologies	tRF-23-JY7383RP7	0.00586421
NSCLC	tRF-27-Q1Q89P9L842	0.0057607
All histologies	tRF-30-RK9P4P9L5HMV	0.00573809
All histologies	tRF-27-I89NJ4S2I7K	0.00571091
All histologies	tRF-31-R29P4P9L5HJVE	0.00570277
All histologies	tRF-34-QKF1R3WE8RO8IS	0.00568662
All histologies	tRF-18-V47P59D9	0.00554892
All histologies	tRF-22-WD8YQ84V2	0.00552629
NSCLC	tRF-29-3IRW18V6XOIE	0.00552384
All histologies	tRF-32-RKVP4P9L5FZU3	0.00545743
NSCLC	tRF-32-PSQP4PW3FJI01	0.00538681
NSCLC	tRF-31-86V8WPMN1E8Y0	0.00536809
NSCLC	tRF-26-PNR8YP9LOND	0.00532186
All histologies	tRF-22-JY7383RPF	0.00525557
All histologies	tRF-27-RK9P4P9L5HK	0.00523384
All histologies	tRF-48-PNR8YP9LON4VN1EH6KDJ	0.00519403
NSCLC	tRF-29-86V8WPMN1EJ3	0.00512944
NSCLC	tRF-22-877343RX4	0.00511264
All histologies	tRF-23-I89NJ4S2DE	0.0050909
NSCLC	tRF-29-6978WPRLXNHK	0.00506366
NSCLC	tRF-26-R29P4P9L5HD	0.00505589
NSCLC	tRF-25-94SX73V2Y8	0.00495146
NSCLC	tRF-31-86J8WPMN1E8Y0	0.00493494
NSCLC	tRF-28-R8WP9N1EWJDW	0.00492209
NSCLC	tRF-23-P4R8YP9LD6	0.00491509
All histologies	tRF-28-6SXMSL73VLD5	0.00487267
All histologies	tRF-21-Z3R918VBE	0.00485477
NSCLC	tRF-32-Q1Q89P9L8422Q	0.00482022
All histologies	tRF-27-Q1Q89P9L842	0.00480498
NSCLC	tRF-24-R918VBY9I3	0.00473623
All histologies	tRF-26-PS5P4PW3FJB	0.00473258
All histologies	tRF-29-3IRW18V6XOIE	0.00471026
NSCLC	tRF-22-WD8YQ84V2	0.00468684
All histologies	tRF-29-6978WPRLXNHK	0.00468312
NSCLC	tRF-28-6SXMSL73VLD5	0.00464145
NSCLC	tRF-32-87R8WP9I1EWJM	0.00460994
NSCLC	tRF-32-86V8WPMN1E8YN	0.00459833
NSCLC	tRF-18-79MP9P04	0.0045954
All histologies	tRF-18-HR6HFRD2	0.00459333
All histologies	tRF-28-IK9NJ4S2I7DM	0.00456209
NSCLC	tRF-31-R3SJ83RPFV7IE	0.00454283
All histologies	tRF-18-83RPD90K	0.00451168
NSCLC	tRF-27-7343RX6NMH3	0.00447797
All histologies	tRF-26-P4R8YP9LOND	0.00445715
All histologies	tRF-25-Q99P9P9NH5	0.00444677
All histologies	tRF-31-ZRS3S3RX8HYVD	0.00442169
All histologies	tRF-24-KY7343RXI7	0.00440692
All histologies	tRF-22-PNR8YP9LL	0.0043911
All histologies	tRF-29-6RRNLIK898HR	0.00436938
All histologies	tRF-23-PNR8YP9LD6	0.00435058
NSCLC	tRF-27-N3R718YKISM	0.00434509
All histologies	tRF-29-94SX73V2Y81W	0.00433302
NSCLC	tRF-31-RKVP4P9L5FZUD	0.00430555
All histologies	tRF-22-93R918VBQ	0.00429761
NSCLC	tRF-20-R29P4P9L	0.00429259
All histologies	tRF-17-Q1Q89PP	0.00429077
All histologies	tRF-31-86V8WPMN1E8Y0	0.00426623
NSCLC	tRF-29-PW5SVP9N15JP	0.00425888
All histologies	tRF-32-PW5SVP9N15WVN	0.00422599
NSCLC	tRF-23-R918VBY9DV	0.00422392
All histologies	tRF-35-86J8WPMN1E8Y7Z	0.00422169
NSCLC	tRF-21-947673FEE	0.00420574
All histologies	tRF-27-P4R8YP9LON3	0.00419703
All histologies	tRF-28-RK9P4P9L5HDN	0.00419126
All histologies	tRF-22-94SX73V2Q	0.004182
All histologies	tRF-31-Q1Q89P9L8422E	0.00415725
All histologies	tRF-32-Q1Q89P9L8422Q	0.00413134
All histologies	tRF-33-M2OSRNLNKSEKDS	0.0041107
All histologies	tRF-18-OUR83004	0.00409398
NSCLC	tRF-24-KY7343RXI7	0.00409215
All histologies	tRF-29-OSRNLNKSEKH9	0.00408413
All histologies	tRF-22-WP9N1EWJM	0.00408229
All histologies	tRF-30-6SXMSL73VL4Y	0.00407852
NSCLC	tRF-21-I89NJ4S2B	0.00405858
All histologies	tRF-32-86V8WPMN1E8YN	0.00400082
All histologies	tRF-22-7383RPD95	0.00399039
NSCLC	tRF-35-86J8WPMN1E8Y7Z	0.00396476
NSCLC	tRF-24-7343RX6N19	0.0039533
NSCLC	tRF-32-PS5P4PW3FJHP1	0.00393375
All histologies	tRF-22-79MP9P9NI	0.00392849
All histologies	tRF-31-PS5P4PW3FJHPB	0.00389764
All histologies	tRF-24-PNR8YP9LH7	0.0038826
NSCLC	tRF-35-PW5SVP9N15WV7W	0.00387905
All histologies	tRF-27-7343RX6NMH3	0.00387787
NSCLC	tRF-24-9MV47P59I8	0.00387594
NSCLC	tRF-32-LQ947673FEWSJ	0.00386251
All histologies	tRF-19-J4S2I71V	0.00384985
All histologies	tRF-32-LQ947673FEWSJ	0.00384071
NSCLC	tRF-21-PNR8YP9L0	0.00383703
All histologies	tRF-24-389MV47PIE	0.00382883
NSCLC	tRF-31-LQ947673FEWSD	0.00382664
NSCLC	tRF-30-79MP9P9NH57S	0.00382651
All histologies	tRF-33-I8W47W1R7HFEV	0.00379362
NSCLC	tRF-30-RK9P4P9L5HMV	0.00379246
All histologies	tRF-21-R29P4P9L0	0.00378239
NSCLC	tRF-29-5DMKYUYRLHIX	0.00372583
NSCLC	tRF-29-OSRNLNKSEKH9	0.00372072
All histologies	tRF-28-08R959KUMK9	0.00371742
All histologies	tRF-30-34HWH3RXSINH	0.00369973
All histologies	tRF-34-JJ6RRNLIK898HR	0.00368584
All histologies	tRF-27-93R918VBY9M	0.00367302
NSCLC	tRF-30-JY7383RPD9W1	0.00365976
All histologies	tRF-19-RKIP4OF4	0.00365035
All histologies	tRF-25-79MP9P9NH5	0.00361586
All histologies	tRF-31-6SXMSL73VL4YD	0.00359956
All histologies	tRF-20-J4S2I7L7	0.00358987
All histologies	tRF-24-79MP9P9NF2	0.00358449
NSCLC	tRF-18-JHOJ7IDY	0.00358244
NSCLC	tRF-36-L85DMKYUYRLHR0D	0.00357251
All histologies	tRF-30-J87383RPD9W1	0.00356316
NSCLC	tRF-18-9NJ4S2DE	0.00356101
NSCLC	tRF-18-73VL4YDN	0.00355988
NSCLC	tRF-24-PNR8YP9LH7	0.00353908
All histologies	tRF-32-PSQP4PW3FJI01	0.00353561
All histologies	tRF-21-I8W47W1R0	0.00353505
NSCLC	tRF-25-6978WPRLXN	0.00352798
All histologies	tRF-33-79MP9P9NH57SD3	0.00352154
NSCLC	tRF-24-79MP9P9NF2	0.00351546
All histologies	tRF-31-LSN3S3RQJVDEE	0.00351158
NSCLC	tRF-24-N3S3RQJV0X	0.00348178
NSCLC	tRF-28-P4R8YP9LOND5	0.00347967
NSCLC	tRF-17-R29P4PP	0.00345156
NSCLC	tRF-28-J87383RPD90K	0.00344859
All histologies	tRF-30-32VIJMRPFQJD	0.00344527
NSCLC	tRF-29-RK9P4P9L5HH0	0.0034346
NSCLC	tRF-31-FP18LPMBQ4NKD	0.00341846
All histologies	tRF-17-R29P4PP	0.00337073
NSCLC	tRF-17-73V2Y8K	0.00336572
NSCLC	tRF-31-ZRS3S3RX8HYVD	0.00336379
All histologies	tRF-25-34HWH3RXSI	0.00335607
All histologies	tRF-33-PNR8YP9LON4VDP	0.0033545
All histologies	tRF-39-7Z8L8NRS9NS3341S	0.00334299
NSCLC	tRF-22-JY7383RPF	0.00333942
All histologies	tRF-35-KKM1M3WD8S746D	0.00331592
All histologies	tRF-18-18VBY9DV	0.00328684
All histologies	tRF-28-R8WP9N1EWJDW	0.00328404
NSCLC	tRF-23-R8YP9LOND5	0.00328242
NSCLC	tRF-17-6SXMSLN	0.00327864
NSCLC	tRF-26-PS5P4PW3FJB	0.00327263
All histologies	tRF-30-79MP9P9NH57S	0.00327227
NSCLC	tRF-32-PNR8YO9LON4V3	0.00326777
All histologies	tRF-32-87R8WP9I1EWJM	0.00326017
All histologies	tRF-30-PS5P4PW3FJHP	0.00322388
NSCLC	tRF-33-R008R959KUMK9	0.00322156
NSCLC	tRF-32-6978WPRLXN4VQ	0.00321685
All histologies	tRF-24-R918VBY9I3	0.00321243
All histologies	tRF-23-W47W1R7HX	0.00320364
All histologies	tRF-26-389MV47P590	0.00319716
NSCLC	tRF-25-P4R8YP9LON	0.00319007
All histologies	tRF-28-XMSL73VL4YDN	0.00317809
NSCLC	tRF-23-Q99P9P9NDD	0.00317481
NSCLC	tRF-32-RKVP4P9L5FZU3	0.00315535
All histologies	tRF-29-I89NJ4S2I71V	0.00314806
All histologies	tRF-23-R718YKISD8	0.00314131
NSCLC	tRF-32-Q99P9P9NH57SJ	0.003132
All histologies	tRF-23-I8W47W1R00	0.00311837
NSCLC	tRF-21-R8YP9LOND	0.00310781
NSCLC	tRF-30-PSQP4PW3FJI0	0.00310644
NSCLC	tRF-24-9NJ4S2I71V	0.00310562
NSCLC	tRF-21-RK9P4P9L0	0.00308947
All histologies	tRF-28-6978WPRLXND5	0.00308763
NSCLC	tRF-31-MUWLV47PU9XWE	0.00308286
All histologies	tRF-27-87R8WP9N1E5	0.00307761
NSCLC	tRF-17-Q1Q89PP	0.00307609
NSCLC	tRF-22-I89NJ4S2I	0.00307003
All histologies	tRF-28-LY7L73HQP0DE	0.00306874
All histologies	tRF-36-6SXMSL73VL4YMYE	0.00304801
All histologies	tRF-24-N3S3RQJV0X	0.00304143
NSCLC	tRF-29-I89NJ4S2I71V	0.00302438
NSCLC	tRF-23-SX73V2Y8DM	0.0029844
NSCLC	tRF-34-I8W47W1R7HFEE2	0.002978
All histologies	tRF-30-PSQP4PW3FJI0	0.00297337
NSCLC	tRF-31-6978WPRLXN48E	0.00296741
All histologies	tRF-25-94SX73V2Y8	0.00295715
All histologies	tRF-29-79MP9P9NH525	0.0029484
All histologies	tRF-26-9MV47P596VE	0.0029406
All histologies	tRF-20-S3M8309N	0.0029316
NSCLC	tRF-23-PNR8YP9LD6	0.00292224
NSCLC	tRF-31-I8W47W1R7HFEB	0.0029104
NSCLC	tRF-31-K84J83ML5FX2D	0.0029065
All histologies	tRF-29-34HWH3RXSIHM	0.00290646
NSCLC	tRF-28-79MP9P9NH50E	0.00290415
All histologies	tRF-32-1HPSR9O9337KF	0.00289698
NSCLC	tRF-28-6978WPRLXND5	0.00289534
All histologies	tRF-31-PER8YP9LON4VD	0.00289299
All histologies	tRF-22-I89NJ4S2I	0.00289186
NSCLC	tRF-21-V47P596VE	0.00288784
All histologies	tRF-32-Q99P9P9NH57SJ	0.00288011
NSCLC	tRF-25-RKIP4OI3FJ	0.00287976
All histologies	tRF-23-R29P4P9LDS	0.00287864
NSCLC	tRF-22-7383RPD95	0.00286374
All histologies	tRF-26-JY7383RPD9E	0.00285185
All histologies	tRF-20-739P8WQ0	0.00285109
All histologies	tRF-31-PNR8YP9LON4VD	0.00284848
NSCLC	tRF-22-R29P4P9LL	0.00283138
All histologies	tRF-32-68K87SERM4921	0.00282774
All histologies	tRF-22-877343RX4	0.00281325
NSCLC	tRF-18-MBQ4NKDJ	0.0028026
NSCLC	tRF-35-I3Z9HMI8W47W1R	0.00279369
NSCLC	tRF-28-93R918VBY9DV	0.00278602
NSCLC	tRF-26-6SXMSL73VLD	0.00277291
All histologies	tRF-17-884U1D2	0.00276924
All histologies	tRF-29-LSN3S3RQJV0X	0.00275233
All histologies	tRF-31-LQ947673FEWSD	0.00274374
All histologies	tRF-26-Z3M8ZLSSXU0	0.00274055
NSCLC	tRF-21-Z3R918VBE	0.00273953
All histologies	tRF-17-ME6KM8N	0.00273114
NSCLC	tRF-18-H9R8B7D2	0.00273004
All histologies	tRF-30-87R8WP9I1EWJ	0.00272909
All histologies	tRF-26-PW5SVP9N15E	0.00272033
NSCLC	tRF-25-5BF900BY4D	0.00270636
NSCLC	tRF-32-PSQP4PW3FJIK1	0.0027004
All histologies	tRF-31-K84J83ML5FX2D	0.0026997
All histologies	tRF-30-PV94V4SMIFFN	0.00268078
All histologies	tRF-29-J87383RPD9JM	0.00267703
All histologies	tRF-22-M8ZLSSXUL	0.0026568
All histologies	tRF-25-87R8WP9N1E	0.00265205
NSCLC	tRF-30-MUWLV47PU9XW	0.00262593
NSCLC	tRF-21-YSV4V47QD	0.00262492
All histologies	tRF-29-MEF91SS2PMER	0.00262302
All histologies	tRF-23-87R8WP9NY	0.00262248
NSCLC	tRF-17-ME6KM8N	0.00259018
NSCLC	tRF-20-S3M8309N	0.00257474
All histologies	tRF-28-93R918VBY9DV	0.00256336
NSCLC	tRF-20-7343RX6N	0.00255563
All histologies	tRF-32-N3R718YKISQI3	0.00253889
All histologies	tRF-30-623K7SIR3DR2	0.00252532
NSCLC	tRF-21-WP9N1EWJ0	0.0025251
NSCLC	tRF-22-P4R8YP9LL	0.00252054
NSCLC	tRF-48-PNR8YP9LON4VN1EH6KDJ	0.00251309
NSCLC	tRF-29-94SX73V2Y81W	0.00249672
All histologies	tRF-23-RK9P4P9LDS	0.00249609
All histologies	tRF-33-KY7343RX6NMHD5	0.00249597
All histologies	tRF-21-739P8WQ0B	0.00248982
NSCLC	tRF-38-87R8WP9N1EWJQ7D1	0.00246493
NSCLC	tRF-23-79MP9P9NDE	0.00246007
All histologies	tRF-21-YSV4V47QD	0.00245684
All histologies	tRF-29-JY7383RPD9JM	0.00243506
All histologies	tRF-23-IK9NJ4S2DE	0.00243458
NSCLC	tRF-25-Z3R918VBY9	0.00243362
All histologies	tRF-17-73V2Y8K	0.00242213
All histologies	tRF-33-XSXMSL73VL4YDN	0.00240815
All histologies	tRF-24-87R8WP9NEX	0.00240198
NSCLC	tRF-31-PNR8YO9LON4VD	0.00239555
All histologies	tRF-34-6SXMSL73VL4YHE	0.00238831
NSCLC	tRF-28-RK9P4P9L5HDN	0.00237547
NSCLC	tRF-23-JY7383RP7	0.00237451
All histologies	tRF-27-SL73VL4YMYP	0.00236427
All histologies	tRF-29-PNR8YP9LONHK	0.00234982
All histologies	tRF-21-947673FEE	0.00233714
NSCLC	tRF-27-RK9P4P9L5HK	0.00233408
NSCLC	tRF-25-PW5SVP9N15	0.00232961
All histologies	tRF-18-YP9LOND5	0.00232206
All histologies	tRF-19-V47P59I8	0.00231445
All histologies	tRF-30-Q1Q89P9L8422	0.00231383
All histologies	tRF-22-R718YKISM	0.00231272
NSCLC	tRF-21-9NJ4S2I7D	0.00231237
All histologies	tRF-20-V47P596V	0.00230892
NSCLC	tRF-30-PW5SVP9N15WV	0.00229781
All histologies	tRF-22-9NJ4S2I7K	0.00229615
NSCLC	tRF-18-OUR83004	0.00228668
All histologies	tRF-30-P4R8YP9LON4V	0.00228206
NSCLC	tRF-31-LSN3S3RQJVDEE	0.00227984
NSCLC	tRF-20-9NJ4S2I7	0.00227777
NSCLC	tRF-23-79MP9P9NDD	0.00226935
All histologies	tRF-32-389MV47P596V5	0.00226582
NSCLC	tRF-31-P4R8YP9LON4VD	0.00224721
All histologies	tRF-37-QKF1R3WE8RO86J2	0.00224396
NSCLC	tRF-30-32VIJMRPFQJD	0.00224258
All histologies	tRF-17-WS72092	0.00224164
All histologies	tRF-21-43RX6NMHD	0.00223861
NSCLC	tRF-32-RK9P4P9L5HMVQ	0.00222401
NSCLC	tRF-32-86J8WPMN1E8YN	0.002221
NSCLC	tRF-22-RK9P4P9LL	0.00222006
NSCLC	tRF-33-JJ6RRNLIK898D6	0.00221945
All histologies	tRF-28-7EMQ18Y3E7D8	0.00220868
All histologies	tRF-23-SX73V2Y8DM	0.00220624
All histologies	tRF-42-I3Z9HMI8W47W1R7HH	0.0022044
All histologies	tRF-25-947673FEWS	0.00220212
NSCLC	tRF-27-93R918VBY9M	0.00218495
NSCLC	tRF-23-R718YKISD8	0.00217614
NSCLC	tRF-32-79MP9P9MH57SJ	0.00217334
All histologies	tRF-29-5DMKYUYRLHIX	0.00215408
NSCLC	tRF-32-XSXMSL73VL4YK	0.00213921
All histologies	tRF-33-86V8WPMN1E8Y0E	0.00213229
All histologies	tRF-33-QJ3KYUYRR6RBD2	0.00211971
NSCLC	tRF-21-YP9LON4VD	0.00211917
All histologies	tRF-40-7Z8L8NRS9NS334L2	0.00211316
NSCLC	tRF-29-34HWH3RXSIHM	0.00208654
NSCLC	tRF-33-79MP9P9MH57SD3	0.00208612
All histologies	tRF-35-I3Z9HMI8W47W1R	0.00206238
NSCLC	tRF-36-87R8WP9N1EWJQ7D	0.00205873
All histologies	tRF-33-PS5P4PW3FJHPW	0.0020572
All histologies	tRF-32-PS5P4PW3FJHP1	0.00204884
NSCLC	tRF-35-P4R8YP9LON4VN1	0.00204584
NSCLC	tRF-28-86J8WPMN1E0J	0.00204567
All histologies	tRF-26-86J8WPMN1EE	0.00202985
All histologies	tRF-31-MUWLV47PU9XWE	0.00202248
All histologies	tRF-22-RK9P4P9LL	0.00201973
NSCLC	tRF-27-KY7343RX6NK	0.00201209
All histologies	tRF-23-7383RPD90K	0.00199181
All histologies	tRF-28-J87383RPD90K	0.00197857
All histologies	tRF-20-PNR8YP9L	0.00197832
NSCLC	tRF-28-87R8WP9N1E0K	0.00197637
NSCLC	tRF-22-YP9LON4V3	0.00197341
NSCLC	tRF-31-94SX73V2Y8L9E	0.00196996
NSCLC	tRF-29-MEF91SS2PMER	0.00196445
NSCLC	tRF-33-PW5SVP9N15WV0E	0.00195431
NSCLC	tRF-21-7383RPD9E	0.00195074
NSCLC	tRF-31-JY7383RPD9W1E	0.00194594
All histologies	tRF-23-947673FE03	0.00194442
All histologies	tRF-22-7343RX6NK	0.00194365
All histologies	tRF-23-Q99P9P9NDD	0.00193896
All histologies	tRF-17-83RPD95	0.00192441
NSCLC	tRF-20-ZLSSXUOL	0.00190117
All histologies	tRF-33-R008R959KUMK9	0.00189374
All histologies	tRF-24-9MV47P59I8	0.00186798
NSCLC	tRF-30-IK9NJ4S2I7L7	0.00186647
NSCLC	tRF-20-R918VBY9	0.00184321
NSCLC	tRF-25-I8W47W1R7H	0.00184109
NSCLC	tRF-24-J87383RPEE	0.00183336
NSCLC	tRF-21-YU4RRWRBD	0.00182539
All histologies	tRF-24-J87383RPEE	0.00182039
All histologies	tRF-18-79MP9P04	0.00181329
NSCLC	tRF-30-PNR8YO9LON4V	0.00181061
NSCLC	tRF-24-P4R8YP9LH7	0.00179699
All histologies	tRF-32-87R8WP9N1EWJM	0.0017943
NSCLC	tRF-22-94SX73V2Q	0.00179359
NSCLC	tRF-27-6SXMSL73VL3	0.0017916
All histologies	tRF-33-79MP9P9MH57SD3	0.00178281
NSCLC	tRF-29-IK9NJ4S2I71V	0.00177903
NSCLC	tRF-31-6978WPRLXN4VE	0.00177862
NSCLC	tRF-33-PNR8YP9LON4VDP	0.00177744
NSCLC	tRF-22-WB08Q2B52	0.0017503
All histologies	tRF-29-MUWLV47PU9J8	0.00174665
NSCLC	tRF-29-6RRNLIK898HR	0.00174389
NSCLC	tRF-17-WS72092	0.00174119
NSCLC	tRF-22-SX73V2Y8K	0.00170219
NSCLC	tRF-29-PNR8YP9LONHK	0.00168189
All histologies	tRF-31-PW5SVP9N15WV0	0.00167864
All histologies	tRF-31-1HPSR9O9337KB	0.00166563
NSCLC	tRF-32-KY7343RX6NMH3	0.00165898
NSCLC	tRF-22-9MV47P594	0.00164141
NSCLC	tRF-33-86J8WPMN1E8Y0E	0.00164137
All histologies	tRF-32-KY7343RX6NMH3	0.00160611
NSCLC	tRF-19-V47P59I8	0.0015957
NSCLC	tRF-23-RK9P4P9LDS	0.00158399
NSCLC	tRF-25-I89NJ4S2I7	0.00156381
All histologies	tRF-34-PW5SVP9N15WV2P	0.00154889
All histologies	tRF-18-3290Q4DZ	0.0015163
NSCLC	tRF-30-J87383RPD9W1	0.00151317
NSCLC	tRF-28-LY7L73HQP0DE	0.00151039
NSCLC	tRF-30-6978WPRLXN4V	0.0014574
NSCLC	tRF-26-86J8WPMN1EE	0.00142067
All histologies	tRF-30-KY7343RX6NMH	0.00141935
NSCLC	tRF-18-H9R8O7D2	0.00141432
NSCLC	tRF-35-JJ6RRNLIK898O1	0.00141386
NSCLC	tRF-19-7383RPEE	0.00138713
NSCLC	tRF-34-M2OSRNLNKSEKH9	0.00137224
NSCLC	tRF-20-43RX6NMH	0.00137068
NSCLC	tRF-34-EH623K7SIR3DIY	0.00136319
NSCLC	tRF-26-QNR8VP9NFQB	0.00136107
NSCLC	tRF-33-QJ3KYU4RRWRBD2	0.00134705
NSCLC	tRF-39-7Z8L8NRS9NS3341S	0.00133872
All histologies	tRF-28-87R8WP9N1E0K	0.00132752
NSCLC	tRF-19-S3M830JZ	0.00132702
NSCLC	tRF-31-PNR8YP9LON4VD	0.00131036
NSCLC	tRF-23-R8WP9N1E0K	0.00129442
NSCLC	tRF-26-JY7383RPD9E	0.00128513
NSCLC	tRF-30-YSV4V47Q2WW1	0.0012653
NSCLC	tRF-30-PS5P4PW3FJHP	0.0012564
NSCLC	tRF-30-87R8WP9I1EWJ	0.00123036
NSCLC	tRF-23-N3R718YKDE	0.00121312
NSCLC	tRF-29-P4R8YP9LONHK	0.00120825
NSCLC	tRF-24-87R8WP9NEX	0.00117342
NSCLC	tRF-22-M8ZLSSXUL	0.00113919
NSCLC	tRF-18-J4S2I7DM	0.00113352
NSCLC	tRF-22-Z3R918VBQ	0.00109507
NSCLC	tRF-22-R8YP9LON3	0.00109096
NSCLC	tRF-27-R29P4P9L5H2	0.00103578
NSCLC	tRF-18-RK9P4P04	0.00102636
NSCLC	tRF-24-R8YP9LONHK	0.00101557
NSCLC	tRF-21-7W1R7HFEB	0.000975556
NSCLC	tRF-35-KKM1M3WD8S746D	0.00095281
NSCLC	tRF-42-87R8WP9N1EWJQ72SJ	0.000922691
NSCLC	tRF-26-5BF900BY4DE	0.000876903
NSCLC	tRF-30-P4R8YP9LON4V	0.000857842
NSCLC	tRF-22-9NJ4S2I7K	0.000840665
NSCLC	tRF-22-R718YKISM	0.000837604
NSCLC	tRF-25-7383RPD9W1	0.000835741
NSCLC	tRF-26-947673FEWSD	0.000808667
NSCLC	tRF-26-KY7343RX6ND	0.000731834
NSCLC	tRF-33-87R8WP9I1EWJDW	0.00071782
NSCLC	tRF-25-N3R718YKIS	0.000672355
NSCLC	tRF-19-7673FEJ5	0.000600419
NSCLC	tRF-21-83RPD9W1E	0.000573416
NSCLC	tRF-26-389MV47P590	0.000567473
NSCLC	tRF-23-IK9NJ4S2DE	0.000546312
